# Supplementary material for: Exon junction complex dependent mRNA localization is linked to centrosome organization during ciliogenesis
Source: Nat Commun. 2021 Mar 1;12:1351. doi: 10.1038/s41467-021-21590-w (PMC7921557; doi:10.1038/s41467-021-21590-w)
Supplement: Supplementary file 3 — Supplementary Data 2 [file 41467_2021_21590_MOESM3_ESM.pdf]

Oligonucleotide sequence (5' end on the left, 3' end on the right ; concatenation of first barcode (25 nucleotides), FLAP Y sequence : TTACACTGCGACCTGTCGACATGCATT, target-specific hybridization sequence, FLAP X sequence : CCTCCTAAGTTTCGAGCTGGACTCAGTG, second barcode (25 nucleotides))

[illegible]

ATCTCGGGTTCGCTCAGTCAGATTACACTCGGACCTCGTCGACATGCATTACCTCAGGTGCTGCATCTTCACACACTATCCTCCTAAGTTTCGAGCTGGACTCAGTGGGCGTTGAGTTGGTCCCTTCGTTAG  
ATCCTGGGTTCTGCTCAGTCAGATTACACTCGGACCTCGTCGACATGCATTATTCAGACGACTGTTTTCCTTTAAAGAGAGCCTCCTAAGTTTCGAGCTGGACTCAGTGGGCGTTGAGTTGGTCCCTTCGTTAG

[illegible]

ATCTCGGGTCTTGCCACAGTCAGATTACACTCGAAGCTCGTCGACATGCATTCTCATTCGTTCTCCATGACAGTACCAGCCTCTCAAGTTTCTGAGCTGGACTCAGTGGGCGTTGAGTTGGTCCCTTCGTTAG  
ATCTCGGGTCTTGCCACAGTCAGATTACACTCGAAGCTCGTCGACATGCATTCTCATTCGCTGTTCAAGCACTCCAGCCTCTCAAGTTTCTGAGCTGGACTCAGTGGGCGTTGAGTTGGTCCCTTCGTTAG  
ATCTCGGGTCTTGCCACAGTCAGATTACACTCGAAGCTCGTCGACATGCATTAGAGTTGTTCTTGAGCTAGTCAATCTTCTTGCTCGCTCAAGTTTCTGAGCTGGACTCAGTGGGCGTTGAGTTGGTCCCTTCGTTAG

[illegible][illegible]

[illegible]
